# Supplementary material for: Premature Atrial Stimulation Accentuates Conduction Abnormalities in Cardiac Surgery Patients that Develop Postoperative Atrial Fibrillation
Source: bioRxiv or medRxiv preprint supplement (doi:10.1101/2021.07.29.21261342), 2021-07-31
Supplement: Supplementary file [file media-1.pdf]

## SUPPLEMENTAL MATERIAL

# Premature Atrial Stimulation Accentuates Conduction Abnormalities in Cardiac Surgery Patients that Develop Postoperative Atrial Fibrillation

**Authors:** Muhammad S. Khan, PhD,<sup>1</sup> Matthias Lange, PhD,<sup>1</sup> Ravi Ranjan, MD, PhD,<sup>1,2,3</sup> Vikas Sharma, MD,<sup>4</sup> Jason P. Glotzbach, MD,<sup>4</sup> Craig Selzman, MD,<sup>1,4</sup> Derek J. Dossdall, PhD,<sup>1,2,3,4,\*</sup>

**Affiliations:** <sup>1</sup> Nora Eccles Harrison Cardiovascular Research and Training Institute,

<sup>2</sup> Division of Cardiovascular Medicine, Department of Internal Medicine,

<sup>3</sup> Department of Bioengineering,

<sup>4</sup> Division of Cardiothoracic Surgery, Department of Surgery,

The University of Utah – Health, Salt Lake City, UT 84112, USA.

**\* Address For Correspondence:**

Dr. Derek J. Dossdall, PhD, FHRS, FAHA

Associate Professor of Surgery, Division of Cardiothoracic Surgery,

The University of Utah – Health, Salt Lake City, UT 84112 USA

Email: [derek.dossdall@utah.edu](mailto:derek.dossdall@utah.edu) / Ph: (+1) 801-587-2036

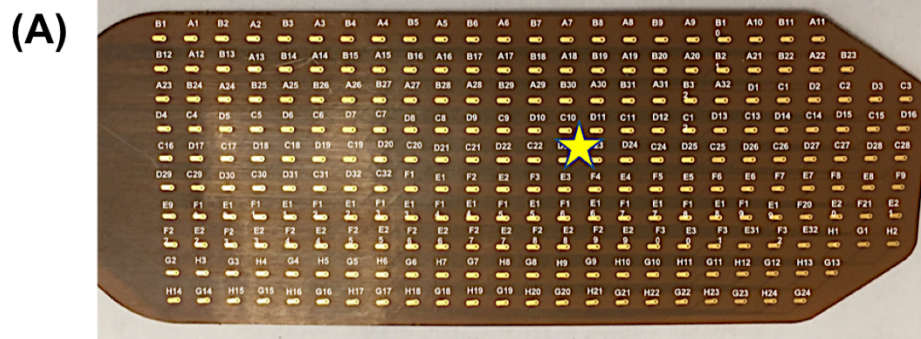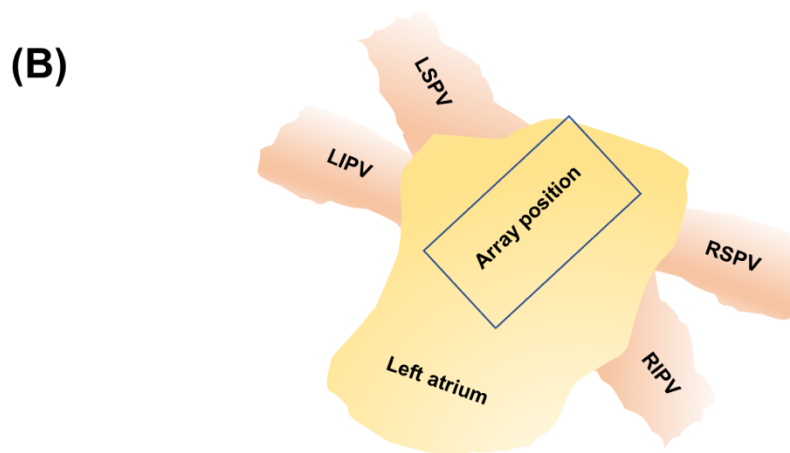

**Fig. S1. (A)** Flexible array of 240-electrodes used in the intraoperative study to collect epicardial atrial activation time data in sinus and S1S2 pacing. **(B)** A schematic representation of an array positioned on posterior LA wall in between PVs (not drawn to scale). Star (★) represents the site of pacing electrodes.

**Table S1.** Comparing effectiveness of a shortest premature captured atrial beat S2 with S1 (600 ms) to quantify CB, CD and CDCDB in patients that remained sinus and developed POAF during 1 – 4 days post-cardiac surgery.

| <b>Group</b> | <b>Conduction disorder type</b> | <b>S1 (mm<sup>2</sup>)</b> | <b>S2 (mm<sup>2</sup>)</b> | <b>p value</b> |
|--------------|---------------------------------|----------------------------|----------------------------|----------------|
| Sinus        | CB                              | 0.56±1.18                  | 1.34±2.86                  | 0.126          |
|              | CD                              | 3.33±3.36                  | 6.06±4.22                  | 0.004          |
|              | CDCB                            | 3.89±4.39                  | 7.41±6.39                  | 0.004          |
| POAF         | CB                              | 1.32±2.16                  | 4.10±3.75                  | 0.125          |
|              | CD                              | 6.39±5.93                  | 13.26±6.49                 | 0.032          |
|              | CDCB                            | 7.71±6.92                  | 17.36±8.75                 | 0.031          |
